# Supplementary material for: Tandem duplication of a genomic region encoding glutathione S-transferase epsilon-2 and -4 genes in DDT-resistant Anopheles stephensi strain from India
Source: PubMed Central journal article supplement (PMC9596695; doi:10.1038/s41598-022-21522-8), 2022-10-25
Supplement: 41598_2022_21522_MOESM1_ESM.pdf [file 41598_2022_21522_MOESM1_ESM.pdf]

# **Tandem duplication of a genomic region encoding glutathione S transferase epsilon-2 and -4 genes in DDT-resistant *Anopheles stephensi* strain from India**

Cherry L. Dykes<sup>†1</sup>, Gunjan Sharma<sup>†1</sup>, Abhisek K. Behera<sup>1</sup>, Neera Kapoor<sup>2</sup>, Mark J. I. Paine<sup>3</sup>, Martin J. Donnelly<sup>3</sup>, Om P. Singh<sup>\*1</sup>

<sup>1</sup>National Institute of Malaria Research, Sector 8, Dwarka, New Delhi-110077, India

<sup>2</sup>Indira Gandhi National Open University, Maidangarhi, New Delhi-110068, India

<sup>3</sup>Department of Vector Biology, Liverpool School of Tropical Medicine, L3 5QA, United Kingdom

<sup>†</sup>Contributed equally

\*Corresponding author (dr.opsingh@gmail.com; singh@nimr.org.in)

## Supplementray information

**Table S1 List of primers used in the study**

| Name of primer | Sequence (5'—3')                  |
|----------------|-----------------------------------|
| 1. E1F         | TCA GTT CAT TGC CGA CTT TG        |
| 2. E5R         | CCT GGT TGA GCT GCT CGT A         |
| 3. E1F2        | TGA AGC CGG AAT TCT TGA AGG       |
| 4. E5R2        | TAG CTT TGA TCG CAT TTT TAA GTC T |
| 5. E2F         | CTC CAA CGA CCA CAA TCA TG        |
| 6. E2R         | TGC TTC AAG TTA CGT TTG TGC       |
| 7. E4F         | CTT GCA AGC GAG TGG AAC T         |
| 8. E4R         | ATC ACT TCG AAC AGA CGC TG        |
| 9. E2qF        | GCC GAC TTT AGC TGC ATC TC        |
| 10. E2qR       | TCT CTT CCT TTT TGG CCA GTA       |
| 11. E21qF      | TCT AGC ATT ATG GGC GTT GTT G     |
| 12. E21qR      | CTT TGT CCA GCG CAA CAA C         |
| 13. E22qF      | CTA GCA TTA TGG GCT CCA CG        |
| 14. E22qR      | CTT TGT CCA GCG CAA TGC T         |
| 15. St_S7F     | TGC GTG AAT TGG AGA AGA AGT T     |
| 16. St_S7R     | CAG GAT GGC ATC GTA CAC AG        |
| 17. PSR        | CGA TCA GAT TGA TGG GCA CG        |
| 18. PS1F       | GTC AGG CCA TCA CAG CTT G         |
| 19. PS1R       | TTG ACC AGC TCC AAG CTG TG        |
| 20. PS2F       | CAG ACC ATC ACA GGG CAG T         |
| 21. PS2R       | CTG ACC AGC TCC AAC ACC AT        |
| 22. ISF        | CCG AAT ACG GTA AGC TCC AA        |
| 23. ISR        | CGT CGT GTG CTA AAC GAT GA        |

**Table S2 List of upregulated genes based on NOISeq's analysis**

(‘M’ is the log<sub>2</sub>-ratio of the two conditions, and ‘D’ is the value of the difference between conditions)

| Gene ID           | Mean expression    |                    | Differential expression statistics |                    | Probability        | Ranking            |
|-------------------|--------------------|--------------------|------------------------------------|--------------------|--------------------|--------------------|
|                   | Alw-R              | Che-S              | M                                  | D                  |                    |                    |
| ASTE006325        | 992.0955207        | 94.50517752        | 3.392013757                        | 897.5903431        | 0.978304979        | 897.5967524        |
| ASTE006367        | 197.7640497        | 22.85166178        | 3.113409204                        | 174.9123879        | 0.966520993        | 174.9400948        |
| ASTE016435        | 2167.430819        | 536.1910046        | 2.015167024                        | 1631.239814        | 0.954502887        | 1631.241059        |
| ASTE016494        | 224.35614          | 61.60749918        | 1.864612788                        | 162.7486408        | 0.953644451        | 162.7593219        |
| ASTE016243        | 136.8400892        | 32.84926381        | 2.058558006                        | 103.9908254        | 0.955595442        | 104.0111986        |
| ASTE005881        | 126.4878898        | 34.73743078        | 1.864436306                        | 91.75045906        | 0.953644451        | 91.76940046        |
| ASTE005891        | 304.7952635        | 66.06163664        | 2.205955866                        | 238.7336269        | 0.956453879        | 238.7438184        |
| ASTE004102        | 86.11236273        | 19.09953511        | 2.17268285                         | 67.01282762        | 0.956453879        | 67.04803962        |
| ASTE010150        | 276.5655372        | 63.13255712        | 2.131165301                        | 213.4329801        | 0.956453879        | 213.4436198        |
| ASTE008971        | 99.58386888        | 3.025908604        | 5.040471748                        | 96.55796028        | 0.996722335        | 96.6894309         |
| ASTE002155        | 14.9921682         | 1.161948904        | 3.689590511                        | 13.8302193         | 0.970110816        | 14.31391085        |
| ASTE002156        | 1385.654558        | 72.52497742        | 4.255945888                        | 1313.12958         | 0.987162479        | 1313.136477        |
| ASTE009555        | 77.6512431         | 21.66550561        | 1.841609116                        | 55.98573749        | 0.953410332        | 56.01601848        |
| ASTE007704        | 55.40668664        | 3.679504863        | 3.912476549                        | 51.72718178        | 0.983728734        | 51.87493429        |
| ASTE001895        | 92.00005428        | 14.66960491        | 2.648804696                        | 77.33044936        | 0.959380365        | 77.3758009         |
| ASTE014827        | 26.86502962        | 3.074323142        | 3.127388709                        | 23.79070648        | 0.962306852        | 23.99538029        |
| ASTE011694        | 350.4931078        | 80.65861975        | 2.119485452                        | 269.8344881        | 0.956453879        | 269.842812         |
| ASTE010348        | 28.42468301        | 5.228770068        | 2.442600725                        | 23.19591294        | 0.95395661         | 23.32416506        |
| ASTE010406        | 765.3024223        | 156.1610912        | 2.292994926                        | 609.141331         | 0.957468394        | 609.1456468        |
| ASTE010010        | 57.12230537        | 4.647795616        | 3.619435672                        | 52.47450975        | 0.983728734        | 52.59918714        |
| ASTE008531        | 43.14391187        | 0.145243613        | 8.214538458                        | 42.99866826        | 0.999258623        | 43.77629626        |
| ASTE005696        | 292.0840884        | 52.43294429        | 2.477838302                        | 239.6511441        | 0.958443889        | 239.6639534        |
| ASTE006192        | 561.416733         | 141.007341         | 1.993301792                        | 420.409392         | 0.954424848        | 420.4141175        |
| ASTE010525        | 106.7387788        | 27.16055563        | 1.974499512                        | 79.57822317        | 0.954385828        | 79.6027151         |
| ASTE009456        | 942.1866122        | 147.9790344        | 2.670620043                        | 794.2075778        | 0.959380365        | 794.212068         |
| ASTE010606        | 24.21361886        | 4.454137465        | 2.442600725                        | 19.7594814         | 0.952278758        | 19.90988205        |
| ASTE004212        | 1112.266814        | 287.1224156        | 1.953765037                        | 825.1443986        | 0.954346808        | 825.1467117        |
| <b>ASTE016034</b> | <b>236.1510187</b> | <b>60.39713574</b> | <b>1.967157721</b>                 | <b>175.753883</b>  | <b>0.954385828</b> | <b>175.7648915</b> |
| <b>(AsGSTe2)</b>  |                    |                    |                                    |                    |                    |                    |
| <b>ASTE016035</b> | <b>447.5230443</b> | <b>102.6630271</b> | <b>2.124045267</b>                 | <b>344.8600171</b> | <b>0.956453879</b> | <b>344.8665582</b> |
| <b>(AsGSTe4)</b>  |                    |                    |                                    |                    |                    |                    |
| ASTE006568        | 195.5610393        | 27.78994462        | 2.814984113                        | 167.7710947        | 0.959575464        | 167.7947089        |
| ASTE014971        | 40.68745778        | 11.64369631        | 1.805035025                        | 29.04376147        | 0.951108163        | 29.0997978         |
| ASTE002870        | 108.1619625        | 8.932482199        | 3.59798829                         | 99.22948032        | 0.984118932        | 99.2946891         |
| ASTE002872        | 960.8634615        | 137.9330178        | 2.800363595                        | 822.9304437        | 0.959497425        | 822.9352084        |
| ASTE003164        | 451.8315868        | 67.44145097        | 2.74407765                         | 384.3901358        | 0.959380365        | 384.3999303        |
| ASTE010888        | 233.441121         | 43.59729117        | 2.420748312                        | 189.8438298        | 0.95836585         | 189.859263         |

|            |             |             |             |             |             |             |
|------------|-------------|-------------|-------------|-------------|-------------|-------------|
| ASTE011055 | 57.43423605 | 16.388321   | 1.809242915 | 41.04591505 | 0.952786015 | 41.08577006 |
| ASTE010909 | 42.09114583 | 1.936581507 | 4.441932656 | 40.15456433 | 0.9911425   | 40.3995025  |
| ASTE008793 | 80.06870585 | 16.7756373  | 2.254870913 | 63.29306855 | 0.957117216 | 63.33322169 |
| ASTE005244 | 94.20306469 | 23.11794174 | 2.02676104  | 71.08512295 | 0.954776026 | 71.11401033 |
| ASTE003772 | 465.1471276 | 7.020107962 | 6.05005009  | 458.1270196 | 0.99996098  | 458.1669665 |
| ASTE003443 | 43.02693787 | 11.9583908  | 1.847216906 | 31.06854706 | 0.95173248  | 31.12341284 |
| ASTE003899 | 1313.754536 | 387.921483  | 1.759859166 | 925.8330534 | 0.950132667 | 925.834726  |
| ASTE016029 | 53.32065023 | 9.513456651 | 2.486652839 | 43.80719358 | 0.957741533 | 43.87771247 |
| ASTE016031 | 32.20684248 | 2.711214109 | 3.570356273 | 29.49562837 | 0.981894803 | 29.71093295 |
| ASTE010780 | 43.45584255 | 12.17625622 | 1.835479535 | 31.27958632 | 0.95173248  | 31.33339282 |
| ASTE010806 | 362.2879866 | 36.33511052 | 3.317700767 | 325.952876  | 0.972295926 | 325.9697602 |
| ASTE003809 | 9.45539867  | 0.145243613 | 6.02459166  | 9.310155057 | 0.968745123 | 11.08939547 |
| ASTE005482 | 169.378358  | 49.5522793  | 1.773226224 | 119.8260787 | 0.950132667 | 119.8391984 |
| ASTE006972 | 947.7428774 | 28.39512634 | 5.060780473 | 919.3477511 | 0.996722335 | 919.3616801 |
| ASTE006979 | 57.1028097  | 2.783835916 | 4.35841565  | 54.31897378 | 0.989425628 | 54.49354732 |
| ASTE006284 | 192.3247585 | 37.5938885  | 2.354974445 | 154.73087   | 0.957507414 | 154.7487901 |
| ASTE001820 | 121.6919557 | 25.92598492 | 2.2307631   | 95.76597075 | 0.957195255 | 95.79194881 |
| ASTE014603 | 88.64679949 | 23.91678161 | 1.89004528  | 64.73001788 | 0.953605432 | 64.75760563 |
| ASTE016303 | 762.4755505 | 139.2160031 | 2.453366017 | 623.2595474 | 0.95840487  | 623.2643761 |
| ASTE016305 | 540.8293083 | 130.8887026 | 2.046832756 | 409.9406057 | 0.955595442 | 409.9457156 |
| ASTE016306 | 6378.884882 | 1881.340519 | 1.761543245 | 4497.544363 | 0.950132667 | 4497.544708 |
| ASTE016302 | 1498.242037 | 112.3217274 | 3.737561773 | 1385.920309 | 0.984118932 | 1385.925349 |
| ASTE008686 | 82.73961228 | 8.133642328 | 3.346604741 | 74.60596995 | 0.972295926 | 74.68099166 |
| ASTE016150 | 1120.182055 | 181.264029  | 2.62756866  | 938.9180262 | 0.959341345 | 938.9217028 |
| ASTE003419 | 39.79065708 | 4.35730839  | 3.190920594 | 35.43334869 | 0.965194319 | 35.57673641 |
| ASTE015911 | 60.14413381 | 15.46844478 | 1.959095876 | 44.67568902 | 0.953722491 | 44.71862304 |
| ASTE009307 | 133.0189384 | 19.3416078  | 2.781852031 | 113.6773306 | 0.959497425 | 113.7113635 |
| ASTE006624 | 317.486943  | 3.582675787 | 6.469515957 | 313.9042672 | 1           | 313.9709279 |
| ASTE005675 | 137.0545415 | 34.08383452 | 2.007590579 | 102.970707  | 0.954424848 | 102.9902759 |
| ASTE000995 | 923.1003539 | 255.6529661 | 1.852300733 | 667.4473877 | 0.953644451 | 667.449958  |
| ASTE000319 | 13.29604514 | 0.750425334 | 4.147144842 | 12.54561981 | 0.969057281 | 13.2133034  |
| ASTE005986 | 85.2935447  | 22.58538182 | 1.917047254 | 62.70816288 | 0.953566412 | 62.737459   |
| ASTE006025 | 20494.50838 | 4277.037086 | 2.260553761 | 16217.4713  | 0.957234275 | 16217.47145 |
| ASTE007977 | 8.207675959 | 0.338901764 | 4.598034724 | 7.868774195 | 0.95165444  | 9.113700163 |
| ASTE006671 | 300.662182  | 63.64090976 | 2.240117049 | 237.0212723 | 0.957234275 | 237.0318579 |
| ASTE006676 | 94.32003869 | 5.882366326 | 4.003095774 | 88.43767237 | 0.984118932 | 88.52822527 |
| ASTE014742 | 9.338424666 | 0.266279957 | 5.13216345  | 9.072144709 | 0.965818636 | 10.42319103 |
| ASTE001076 | 618.2855947 | 169.9592345 | 1.863084642 | 448.3263602 | 0.953644451 | 448.3302313 |
| ASTE016138 | 111.0863126 | 12.15204895 | 3.192409576 | 98.93426367 | 0.966520993 | 98.98575658 |
| ASTE009073 | 32.12885981 | 4.502552003 | 2.835054939 | 27.62630781 | 0.956453879 | 27.77139571 |
| ASTE005433 | 64.94006798 | 10.84485644 | 2.58209794  | 54.09521154 | 0.959068207 | 54.15680143 |
| ASTE009198 | 9.669851011 | 0.508352645 | 4.249592111 | 9.161498366 | 0.955439363 | 10.0991131  |

|            |             |             |             |             |             |             |
|------------|-------------|-------------|-------------|-------------|-------------|-------------|
| ASTE006822 | 139.7449436 | 7.092729768 | 4.300311291 | 132.6522139 | 0.989698767 | 132.7218992 |
| ASTE006824 | 100.9095743 | 8.448336823 | 3.578251899 | 92.46123744 | 0.984118932 | 92.53045074 |
| ASTE006910 | 78.08014778 | 18.78484061 | 2.055386908 | 59.29530717 | 0.955361324 | 59.33091999 |
| ASTE000047 | 63.6728496  | 12.15204895 | 2.389478745 | 51.52080065 | 0.957897612 | 51.5761816  |
| ASTE008066 | 208.7791018 | 42.07223323 | 2.311037004 | 166.7068685 | 0.957468394 | 166.7228866 |
| ASTE000499 | 34.35136589 | 6.366511703 | 2.431792443 | 27.98485419 | 0.955400343 | 28.09031289 |
| ASTE006794 | 124.1094184 | 24.25568337 | 2.355217872 | 99.85373505 | 0.957819572 | 99.88150707 |
| ASTE004605 | 107.3041532 | 27.06372656 | 1.987273505 | 80.2404266  | 0.954424848 | 80.26503172 |
| ASTE015132 | 819.7343255 | 101.4768709 | 3.014005471 | 718.2574546 | 0.959770563 | 718.2637783 |
| ASTE009889 | 35.07270558 | 6.197060821 | 2.500692695 | 28.87564476 | 0.955985641 | 28.98372516 |
| ASTE008151 | 88.51032982 | 8.278885941 | 3.418337291 | 80.23144388 | 0.978304979 | 80.30423162 |
| ASTE008162 | 11.61941775 | 0.944083484 | 3.621479525 | 10.67533426 | 0.959965663 | 11.27288231 |
| ASTE008166 | 61.54782186 | 16.87246638 | 1.867036923 | 44.67535548 | 0.952981114 | 44.71435132 |
| ASTE006152 | 389.6599035 | 72.42814835 | 2.427593086 | 317.2317552 | 0.95836585  | 317.2410435 |
| ASTE006153 | 266.7202252 | 53.5948932  | 2.315159783 | 213.125332  | 0.957468394 | 213.1379063 |
| ASTE011469 | 8.012719285 | 0.048414538 | 7.370707807 | 7.964304748 | 0.958678008 | 10.85161203 |
| ASTE005296 | 417.0903075 | 75.47826422 | 2.466226636 | 341.6120433 | 0.95840487  | 341.6209455 |
| ASTE005321 | 81.04348922 | 22.39172367 | 1.855730701 | 58.65176555 | 0.953410332 | 58.68111569 |

**Table S3 List of upregulated genes identified through GFOLD**

| GeneSymbol | GFOLD(0.01) | E-FDR | log2fdc | 1stRPKM<br>(Che-s) | 2ndRPKM<br>(Alw-R) |
|------------|-------------|-------|---------|--------------------|--------------------|
| ASTE000047 | 1.95019     | 1     | 2.11679 | 5.11494            | 26.0051            |
| ASTE000319 | 3.28782     | 1     | 3.84687 | 1.57596            | 27.3465            |
| ASTE000499 | 1.92811     | 1     | 2.16237 | 3.77158            | 19.8289            |
| ASTE000995 | 1.57534     | 1     | 1.61239 | 127.204            | 455.094            |
| ASTE001076 | 1.57827     | 1     | 1.62222 | 134.051            | 482.887            |
| ASTE001820 | 1.89104     | 1     | 2.00362 | 6.15155            | 28.8855            |
| ASTE001895 | 2.26501     | 1     | 2.40934 | 15.473             | 96.3141            |
| ASTE002155 | 2.93399     | 1     | 3.43709 | 1.82411            | 23.6572            |
| ASTE002156 | 3.91874     | 1     | 3.98117 | 29.1652            | 539.07             |
| ASTE002870 | 2.50648     | 1     | 2.57507 | 106.223            | 740.845            |
| ASTE002872 | 2.50652     | 1     | 2.55465 | 35.1003            | 241.321            |
| ASTE003164 | 2.43266     | 1     | 2.50278 | 24.6169            | 163.3              |
| ASTE003419 | 2.72568     | 1     | 2.99323 | 1.79583            | 16.8271            |
| ASTE003443 | 1.40614     | 1     | 1.57599 | 2.46956            | 8.62882            |
| ASTE003772 | 5.68656     | 1     | 5.89049 | 3.61393            | 251.801            |
| ASTE003809 | 4.29207     | 1     | 5.55404 | 0.284911           | 17.8662            |
| ASTE003899 | 1.49265     | 1     | 1.52195 | 619.341            | 2081.1             |

|            |         |   |         |           |          |
|------------|---------|---|---------|-----------|----------|
| ASTE004102 | 1.73373 | 1 | 1.86886 | 5.76526   | 24.6654  |
| ASTE004212 | 1.54784 | 1 | 1.58692 | 33.4616   | 117.621  |
| ASTE004605 | 1.65228 | 1 | 1.76717 | 11.8066   | 47.0576  |
| ASTE005244 | 1.66365 | 1 | 1.78521 | 5.19686   | 20.9761  |
| ASTE005296 | 2.18439 | 1 | 2.251   | 30.851    | 171.873  |
| ASTE005321 | 1.47733 | 1 | 1.60821 | 11.958    | 42.6968  |
| ASTE005433 | 2.12483 | 1 | 2.31088 | 5.89019   | 34.2785  |
| ASTE005482 | 1.438   | 1 | 1.52357 | 8.57269   | 28.8485  |
| ASTE005675 | 1.64013 | 1 | 1.76309 | 51.2604   | 203.757  |
| ASTE005696 | 2.13298 | 1 | 2.21353 | 65.9338   | 357.953  |
| ASTE005881 | 1.53081 | 1 | 1.62705 | 18.7197   | 67.6881  |
| ASTE005891 | 1.93998 | 1 | 2.015   | 45.373    | 214.643  |
| ASTE005986 | 1.59137 | 1 | 1.72009 | 8.1805    | 31.5644  |
| ASTE006025 | 2.02433 | 1 | 2.03367 | 2481.48   | 11887.7  |
| ASTE006152 | 2.12127 | 1 | 2.1982  | 150.742   | 809.691  |
| ASTE006153 | 2.00834 | 1 | 2.0855  | 82.8873   | 411.759  |
| ASTE006192 | 1.70732 | 1 | 1.75815 | 57.8666   | 229.055  |
| ASTE006284 | 2.01409 | 1 | 2.10936 | 12.8323   | 64.8239  |
| ASTE006325 | 3.08001 | 1 | 3.13643 | 56.8659   | 585.202  |
| ASTE006367 | 2.78785 | 1 | 2.90602 | 8.86977   | 77.8688  |
| ASTE006568 | 2.46289 | 1 | 2.5728  | 6.93789   | 48.3376  |
| ASTE006624 | 5.93558 | 1 | 6.20394 | 2.04945   | 177.981  |
| ASTE006671 | 1.91241 | 1 | 1.98692 | 31.1222   | 144.39   |
| ASTE006676 | 3.62203 | 1 | 3.85339 | 2.47653   | 42.0759  |
| ASTE006794 | 1.97923 | 1 | 2.10661 | 15.7631   | 79.5158  |
| ASTE006822 | 3.90692 | 1 | 4.10796 | 3.3228    | 67.2734  |
| ASTE006824 | 3.19764 | 1 | 3.38624 | 2.76014   | 33.8648  |
| ASTE006910 | 1.69981 | 1 | 1.83338 | 3.56413   | 14.8773  |
| ASTE006972 | 4.72131 | 1 | 4.82523 | 8.63775   | 286.773  |
| ASTE006979 | 3.75905 | 1 | 4.06809 | 1.36751   | 27.0689  |
| ASTE007704 | 3.41065 | 1 | 3.70134 | 1.59499   | 24.4549  |
| ASTE007977 | 3.47254 | 1 | 4.44059 | 0.244417  | 6.75651  |
| ASTE008066 | 1.99389 | 1 | 2.08278 | 38.6121   | 191.476  |
| ASTE008151 | 2.98651 | 1 | 3.17903 | 2.14571   | 22.8056  |
| ASTE008162 | 2.75962 | 1 | 3.27086 | 0.0808607 | 0.934931 |
| ASTE008166 | 1.5128  | 1 | 1.65777 | 7.29114   | 26.95    |
| ASTE008531 | 6.31558 | 1 | 7.67615 | 0.044576  | 12.7932  |
| ASTE008686 | 2.92383 | 1 | 3.11431 | 3.97092   | 40.3498  |

|                                 |                |          |                |                |                |
|---------------------------------|----------------|----------|----------------|----------------|----------------|
| ASTE008793                      | 1.88014        | 1        | 2.0378         | 28.603         | 137.641        |
| ASTE008971                      | 4.51268        | 1        | 4.82019        | 3.78702        | 126.283        |
| ASTE009073                      | 2.39047        | 1        | 2.66357        | 2.17988        | 16.2528        |
| ASTE009198                      | 3.16584        | 1        | 3.84371        | 0.483897       | 8.51569        |
| ASTE009307                      | 2.41125        | 1        | 2.53817        | 6.42844        | 43.7386        |
| ASTE009456                      | 2.45864        | 1        | 2.50984        | 440.14         | 2933.57        |
| ASTE009555                      | 1.99092        | 1        | 2.11362        | 29.7774        | 150.928        |
| ASTE009889                      | 1.81049        | 1        | 2.04129        | 9.0065         | 43.5297        |
| ASTE010010                      | 3.14965        | 1        | 3.40023        | 3.69711        | 45.9105        |
| ASTE010150                      | 1.81331        | 1        | 1.8853         | 13.9428        | 60.2851        |
| ASTE010348                      | 1.99396        | 1        | 2.23821        | 1.89175        | 10.4869        |
| ASTE010406                      | 2.05213        | 1        | 2.10232        | 287.828        | 1446.29        |
| ASTE010525                      | 1.60308        | 1        | 1.71359        | 4.23253        | 16.2535        |
| ASTE010606                      | 1.93808        | 1        | 2.2024         | 0.961005       | 5.20039        |
| ASTE010780                      | 1.46666        | 1        | 1.6334         | 9.61745        | 34.9671        |
| ASTE010806                      | 2.9379         | 1        | 3.03008        | 19.1432        | 183.077        |
| ASTE010888                      | 2.06251        | 1        | 2.15446        | 11.9774        | 62.4243        |
| ASTE010909                      | 3.8201         | 1        | 4.19101        | 1.56283        | 33.8266        |
| ASTE011055                      | 1.4729         | 1        | 1.62234        | 4.68043        | 16.8815        |
| ASTE011469                      | 4.81909        | 1        | 6.44059        | 0.0967794      | 14.7142        |
| ASTE011694                      | 1.80307        | 1        | 1.8696         | 46.8584        | 200.402        |
| ASTE014603                      | 1.58904        | 1        | 1.71662        | 37.6667        | 144.985        |
| ASTE014742                      | 4.10597        | 1        | 5.06529        | 0.182382       | 7.78083        |
| ASTE014827                      | 2.48384        | 1        | 2.88983        | 8.71015        | 76.5727        |
| ASTE014971                      | 1.44997        | 1        | 1.6267         | 15.7825        | 57.1278        |
| ASTE015132                      | 2.7974         | 1        | 2.85234        | 110.478        | 933.688        |
| ASTE015911                      | 1.59873        | 1        | 1.74358        | 10.6913        | 41.9412        |
| ASTE016029                      | 1.86997        | 1        | 2.06372        | 8.71887        | 42.7543        |
| ASTE016031                      | 2.95862        | 1        | 3.29823        | 2.34153        | 27.2165        |
| <b>ASTE016034<br/>(AsGSTe2)</b> | <b>1.72944</b> | <b>1</b> | <b>1.81215</b> | <b>75.7626</b> | <b>311.412</b> |
| <b>ASTE016035<br/>(AsGSTe4)</b> | <b>1.86215</b> | <b>1</b> | <b>1.9236</b>  | <b>134.33</b>  | <b>596.384</b> |
| ASTE016138                      | 2.78032        | 1        | 2.94331        | 12.8467        | 115.852        |
| ASTE016150                      | 2.33843        | 1        | 2.3809         | 59.5648        | 363.04         |
| ASTE016243                      | 1.57001        | 1        | 1.66592        | 2.10918        | 7.83482        |
| ASTE016302                      | 3.40903        | 1        | 3.45817        | 140.3          | 1804.44        |
| ASTE016303                      | 2.15484        | 1        | 2.20249        | 176.883        | 952.701        |
| ASTE016305                      | 1.80243        | 1        | 1.85108        | 181.359        | 765.63         |

|            |         |   |         |         |         |
|------------|---------|---|---------|---------|---------|
| ASTE016306 | 1.4887  | 1 | 1.50213 | 2416.5  | 8008.75 |
| ASTE016435 | 1.75865 | 1 | 1.78361 | 542.295 | 2184.55 |
| ASTE016494 | 1.52425 | 1 | 1.60335 | 19.0639 | 67.7972 |



**Figure S1**

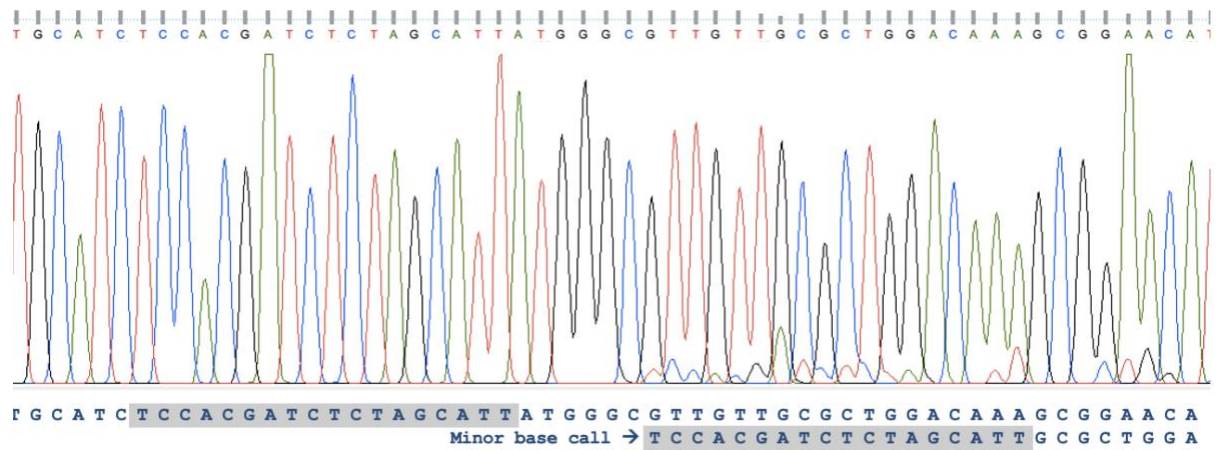

Figure S1: Snapshot of DNA sequence chromatogram showing disproportionate peak heights of variants *AsGSTe2.1* and *AsGSTe2.1* (residual peaks) in a mosquito. The first line of sequence shown at the bottom of the chromatogram is nucleotide base call of major variant *AsGSTe2.1* and the second line is base call of residual peak of variant *AsGSTe2.2* appearing from the point of indel. The highlighted sequence blocks show repeat motif in *AsGSTe2.2*.

|             |                                                                                   |     |
|-------------|-----------------------------------------------------------------------------------|-----|
| PS2.1(1)    | CATGGAAGTCTTTAAATAAAGAGGCACAAACGTAACCTGGAAGCAGCTTCTTATTGAAGTTATCTTCTCGATTAATCATCA | 80  |
| PS2.1(2)    | .....                                                                             |     |
| PS2.1(3)    | .....                                                                             |     |
| Afghanistan | .....G.....                                                                       |     |
| PS2.2       | .....                                                                             |     |
| Delhi       | .....                                                                             |     |
| JQ031268    | .....                                                                             |     |
| KB664467    | ..----.....A.....                                                                 |     |
| CP032234    | ..----.....A.....                                                                 |     |
| Chennai     | ..----.....A.....                                                                 |     |
| PS2.1(1)    | GTTGGCTTCTTACATTTGTACTTGTGTGTTTCGTAAGTGGTACTGGATGCGAACTGAGTTGTACTTGCTGCGGGGCAG    | 160 |
| PS2.1(2)    | .....                                                                             |     |
| PS2.1(3)    | .....                                                                             |     |
| Afghanistan | .....                                                                             |     |
| PS2.2       | .....                                                                             |     |
| Delhi       | .....                                                                             |     |
| JQ031268    | .....                                                                             |     |
| KB664467    | .....G.....                                                                       |     |
| CP032234    | .....G.....                                                                       |     |
| Chennai     | .....G.....                                                                       |     |
| PS2.1(1)    | AAATTGGGACCATCATTAGCGACCGTCAGGCCATCACAG-----CTTGGAGCTGGTCAACTC                    | 240 |
| PS2.1(2)    | .....                                                                             |     |
| PS2.1(3)    | .....                                                                             |     |
| Afghanistan | .....                                                                             |     |
| PS2.2       | .....G..A.....GGCAGTTGAAGGAATCTAATGGTG.....G..T                                   |     |
| Delhi       | .....G..A.....GGCAGTTGAAGGAATCTAATGGTG.....G..T                                   |     |
| JQ031268    | .....G..A.....GGCAGTTGAAGGAATCTAATGGTG.....G..CT                                  |     |
| KB664467    | .....GGCAGTTGAAGGAATCTAATAGTG.....G..G..                                          |     |
| CP032234    | .....GGCAGTTGAAGGAATCTAATAGTG.....G..G..                                          |     |
| Chennai     | .....GGCAGTTGAAGGAATCTAATAGTG.....G..G..                                          |     |
| PS2.1(1)    | TGGCGTGTCTTTCCAACGCAACGATTGCTTCAAATGTCTAAGTGGTCTGTACACGCTTGAACCCACAGTGACACGCT     | 320 |
| PS2.1(2)    | .....                                                                             |     |
| PS2.1(3)    | .....                                                                             |     |
| Afghanistan | .....                                                                             |     |
| PS2.2       | .....A..G..A.....T...A...                                                         |     |
| Delhi       | .....A..G..A.....T...A...                                                         |     |
| JQ031268    | .....A..G..A.....T...A...                                                         |     |
| KB664467    | .....G.....T.....T.                                                               |     |
| CP032234    | .....G.....T.....T.                                                               |     |
| Chennai     | .....G.....T.....T.                                                               |     |
| PS2.1(1)    | GTAGAGTTAACAGGAAACATACCTGTTTGCAGGTGGTCATATGAAGCCGGAGTTCCTGCAGCTATAGGTCCTTGCCGATG  | 400 |
| PS2.1(2)    | .....                                                                             |     |
| PS2.1(3)    | .....                                                                             |     |
| Afghanistan | .....                                                                             |     |
| PS2.2       | .....G.....G.....T...A                                                            |     |
| Delhi       | .....G.....G.....T...A                                                            |     |
| JQ031268    | .....G.....G.....T...A                                                            |     |
| KB664467    | .....G.....G.....                                                                 |     |
| CP032234    | .....G.....G.....                                                                 |     |
| Chennai     | .....G.....G.....                                                                 |     |
| PS1(1)      | TCCATTATGGTGGTATTTTCTATTGAGCGATCGTTATAGCTTAACCCCTCAACATGCGAACCTGGTCTGGATGATGATGG  | 480 |
| PS1(2)      | .....                                                                             |     |
| PS1(3)      | .....                                                                             |     |
| Afghanistan | .....                                                                             |     |
| PS2         | .....G.....C.....T.....A..                                                        |     |
| Delhi       | .....G.....C.....T.....A..                                                        |     |
| JQ031268    | .....G.....C.....T.....A..                                                        |     |
| KB664467    | .....C.....A..T.....A..                                                           |     |
| CP032234    | .....C.....A..T.....A..                                                           |     |
| Chennai     | .....C.....A..T.....A..                                                           |     |
| PS2.1(1)    | TACGATCATCACCAGAGTCATGCGATCATGATCTATCTGGTGCCAGTCTTAACACGACAGGACCGGGTTCAAATCGCA    | 560 |
| PS2.1(2)    | .....                                                                             |     |
| PS2.1(3)    | .....                                                                             |     |
| Afghanistan | .....                                                                             |     |
| PS2.2       | .....-----T.....G.....A.....                                                      |     |
| Delhi       | .....-----T.....G.....A.....                                                      |     |
| JQ031268    | .....-----T.....G.....A.....                                                      |     |
| KB664467    | .....G.....A.....T..                                                              |     |
| CP032234    | .....G.....A.....T..                                                              |     |
| Chennai     | .....G.....A.....T..                                                              |     |

|             |                                                                                  |     |
|-------------|----------------------------------------------------------------------------------|-----|
| PS2.1(1)    | TCTAAGCCGTTCCCCCATAGTGAGGCCAAGACTTCTCGAGGTTGTA-----AGGAAGAAGAAGAAGGAACCGATTGAG   | 640 |
| PS2.1(2)    | .....                                                                            |     |
| PS2.1(3)    | .....                                                                            |     |
| Afghanistan | .....                                                                            |     |
| PS2.2       | ..C.....GTGCCA.....T..                                                           |     |
| Delhi       | ..C.....GTGCCA.....T..                                                           |     |
| JQ031268    | ..C.....GTGCCA.....T..                                                           |     |
| KB664467    | .....C.....T..                                                                   |     |
| CP032234    | .....C.....T..                                                                   |     |
| Chennai     | .....C.....T..                                                                   |     |
| PS2.1(1)    | GGAAGT--TCACATTTGCCAAGAAGGAAGAAATGGTGAAGTTTTAACTCAAATGCGATTTTTATGACCGAAAAACACC   | 720 |
| PS2.1(2)    | .....                                                                            |     |
| PS2.1(3)    | .....                                                                            |     |
| Afghanistan | .....                                                                            |     |
| PS2.2       | .....GT..T.....A.....C.....A.....---                                             |     |
| Delhi       | .....GT..T.....A.....C.....A.....---                                             |     |
| JQ031268    | .....GT..T.....A.....C.....A.....---                                             |     |
| KB664467    | .....GT..T.....C.....---                                                         |     |
| CP032234    | .....GT..T.....C.....---                                                         |     |
| Chennai     | .....GT..T.....C.....---                                                         |     |
| PS2.1(1)    | AGTACATCAGGAGTATAACAGAAACAGTTTAAATCTTATCATGCACTGATAGCTAGACAATAAAACGAGAAGTAAGTGGC | 800 |
| PS2.1(2)    | .....A.....                                                                      |     |
| PS2.1(3)    | .....                                                                            |     |
| Afghanistan | .....                                                                            |     |
| PS2.2       | .....A.....A.....-.....                                                          |     |
| Delhi       | .....A.....A.....-.....                                                          |     |
| JQ031268    | .....A.....A.....-.....                                                          |     |
| KB664467    | .....A.....A.....-.....AT.....A.....                                             |     |
| CP032234    | .....A.....A.....-.....AT.....A.....                                             |     |
| Chennai     | .....A.....A.....-.....AT.....A.....                                             |     |
| PS2.1(1)    | TATTAAGAAAGAAAATTTGATACAAGTCGGAATCAAGGTGCATGTAAGAAACGCGAAAGAAAGACGAACAAATTGTTAA  | 880 |
| PS2.1(2)    | .....                                                                            |     |
| PS2.1(3)    | .....                                                                            |     |
| Afghanistan | .....T.....A.....C.....                                                          |     |
| PS2.2       | .....T.....T.....A.....C.....                                                    |     |
| Delhi       | .....T.....T.....A.....C.....                                                    |     |
| JQ031268    | .....T.....T.....A.....C.....                                                    |     |
| KB664467    | .....T.....T.....A.....C.....                                                    |     |
| CP032234    | .....T.....T.....A.....C.....                                                    |     |
| Chennai     | .....T.....T.....A.....C.....                                                    |     |
| PS2.1(1)    | AGTTGACAAAACC                                                                    | 893 |
| PS2.1(2)    | .....                                                                            |     |
| PS2.1(3)    | .....                                                                            |     |
| Afghanistan | .....                                                                            |     |
| PS2.2       | .....                                                                            |     |
| Delhi       | .....                                                                            |     |
| JQ031268    | .....                                                                            |     |
| KB664467    | .....                                                                            |     |
| CP032234    | .....                                                                            |     |
| Chennai     | .....                                                                            |     |

**Figure S2** Alignment of nucleotide sequences of  $\psi AsGSTe2$ . PS2.1 and PS2.2 represent pseudogenes  $\psi AsGSTe2.1$  and  $\psi AsGSTe2.2$ , respectively, present in Alw-R. KB66446. CP032234 represent  $\psi AsGSTe2$  sequences of SDA-500 strain (originating Pakistan). Delhi and Chennai represent the locality of strains having a single copy of  $\psi AsGSTe2$ . Sequences of Beech (JQ031268, origin: Delhi) and Afghanistan were sourced from Ayres et al <sup>1</sup>.

<sup>1</sup> Ayres CF, Müller P, Dyer N, Wilding CS, Rigden DJ, Donnelly MJ. Comparative genomics of the anopheline glutathione S-transferase epsilon cluster. PLoS ONE 2021; 6: e29237. doi:10.1371/journal.pone.0029237
